# Supplementary material for: Selective aerobic oxidation of para-xylene in sub- and supercritical water. Part 3: effects of geometry and mixing in laboratory scale continuous reactors
Source: Royal Society of Chemistry journal article supplement (doi:10.1039/c5ra26964d), 2016-01-01
Supplement: c5ra26964d1.pdf [file c5ra26964d1.pdf]

# Selective Aerobic Oxidation of *para*-Xylene in Sub- and Supercritical Water. Part 3: Effects of Geometry and Mixing in Laboratory Scale Continuous Reactors.†

Eduardo Pérez,<sup>\*a</sup> Morgan L. Thomas,<sup>a</sup> Duncan Housley,<sup>a</sup> Paul A. Hamley,<sup>a</sup> Joan Fraga-Dubreuil,<sup>a</sup> Jun Li,<sup>b</sup> Edward Lester,<sup>b</sup> and Martyn Poliakoff<sup>\*a</sup>

## SUPPLEMENTARY DATA

### Experimental section

The scheme of the oxidation rig (using reactor configuration = TB as example) is shown in Figure S1. All the experiments were conducted using tubular continuous flow reactors. The continuous oxidation was carried out in high temperature water (HTW), either sub- or supercritical, using aqueous solutions as catalysts. Concentration of *p*-xylene is relatively diluted (0.5% organic w/w). An aqueous solution of H<sub>2</sub>O<sub>2</sub> of 2% vol. was used as the source of O<sub>2</sub>. That solution is driven via a reciprocating pump, which allows for accurate control of the O<sub>2</sub>:substrate ratio. The H<sub>2</sub>O<sub>2</sub> solution was pumped into the system and decomposed in a coiled pre-heater under the required experimental conditions to generate a homogeneous mixture of O<sub>2</sub> and SCW. The residence time in the pre-heater was long enough to achieve total decomposition of H<sub>2</sub>O<sub>2</sub>.

For most of the experiments displayed in Tables 1-2 and Figure 3, the volumetric flow rate through the rig was 12 mL/min. The water/H<sub>2</sub>O<sub>2</sub> flowrate was 8 mL/min; the catalyst flowrate was 4 mL/min and the organic flowrate was 0.06 mL/min. Catalyst strength is typically 7.7 mM feed (2.6 mM in reactor). For OR, the residence time should lie between 2.3 and 3.3 at 380 °C and between 7.4 and 11.9 s at 330 °C, as an approximation, we take the average values (i. e. 2.8 s at 380 °C and 9.65 s at 330 °C). For TB, residence times are calculated, 5.8 s at 380 °C and 19.2 s at 330 °C. For some entries, residence times are varied from these values, the proportion water/H<sub>2</sub>O<sub>2</sub>:catalyst:organic flowrates is kept 8:4:0.06 mL/min and total flowrate is modified in each case to match the reported residence times. At the reactor outlet, the mixture was quenched with a solution of NaOH 1M to prevent precipitation of TA and to keep CO<sub>2</sub> in solution in the form of carbonate. Quench solution flowrate: 3.5 mL/min. All the chemicals were purchased from Aldrich Ltd and used without further purification.

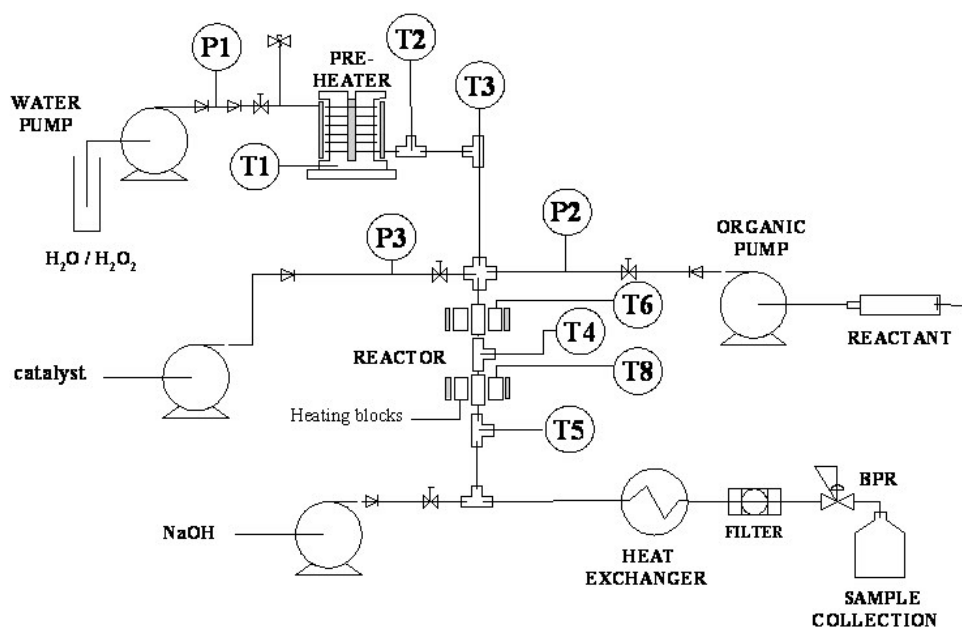

Figure S1. Configuration of the continuous aerobic oxidation reactor. P1-3 pressure transducers. T2-5: log temperatures. T1, T6 and T8: control temperatures.

All the reactors were made of Hastelloy C276 pipe ¼ inch. external diameter and 0.46 cm inner diameter. For TB, the catalyst and organic were delivered from the sides by 1/16 inch hastelloy alloy pipes of 0.57 mm inner diameter.

**CAUTION: This type of oxidation is potentially hazardous, and must be approached with care and a thorough safety assessment must be made.** The apparatus is regularly hydrostatically pressure tested. Before every run, water was pumped at 230

bar and room temperature at the desired flowrates. It was then heated. Once the operating temperature had been reached, the pumps for the reactants were started. Typically, an experiment was run for 40 minutes. The products were collected for sequential periods of 5 min and analysed.

- 5 Analysis of the products was done by HPLC. A Waters Xterra reverse phase C18 column, maintained at 37 °C, was used (flow rate 0.7 mL/min, run time 15 min; UV detection at 230 nm). Solvents acetonitrile (ACN) and CH<sub>3</sub>CO<sub>2</sub>Na/CH<sub>3</sub>CO<sub>2</sub>H buffer were used. The method was as follows: isocratic method (16.7% ACN) for the first 4 minutes; 4-8 min, gradient method (16.7 to 40% ACN); back to isocratic method (16.7% ACN) for the last 7 minutes. The stock buffer solution was prepared by dissolving 15 g CH<sub>3</sub>CO<sub>2</sub>Na anhydrous in 250 mL de-ionised water, before adding CH<sub>3</sub>CO<sub>2</sub>H (50% v/v, 100 mL). The pH was adjusted to 3.9 with 10 5% CH<sub>3</sub>CO<sub>2</sub>H, before diluting to 500 mL. The dilute buffer was prepared by diluting 30 mL of the stock buffer solution to 500 mL with de-ionised water. The following species are quantified by HPLC: Terephthalic acid (TA), 4-methyl-benzaldehyde (p-tolualdehyde, pTOL), 4-hydroxymethyl benzoic acid (HMBA), p-toluic acid (PTA), 4-carboxybenzaldehyde (4CBA), benzoic acid (BA). The selectivity for each compound was calculated as the concentration of that compound divided by the sum of those of the six aromatic compounds. The yield of TA,  $Y_{TA}$ , was calculated by Equation 1

$$15 Y_{TA} = 100 \frac{[TA]}{[pX]} \quad (1)$$

where [pX] is the molar concentration of pX in the sample if the conversion had been 0. i.e. allowing for dilution.  $[pX] = (F_{pX} \times \rho_{pX}) / (F_{total} \times M_{pX})$ , where  $F_{pX}$ ,  $F_{total}$  are the flowrates of pX and the total flow after quench;  $\rho_{pX}$  and  $M_{pX}$  are the density and molar mass of pX respectively.

- 20 The analysis for phenols and benzene was not done because they are present only in very small amounts. Phenols are present in very small amounts because they are oxidized much more rapidly than pX. Benzene is present in very small amounts because it would require the consecutive decarboxylation of terephthalic acid to benzoic acid and then benzoic acid to benzene.

- 25 CO<sub>3</sub><sup>2-</sup> concentration was measured by titration of the sample with HCl 0.2N. The difference between the first two titres was used to calculate the carbonate concentration. The first titre accounts for the excess OH<sup>-</sup> and the second for the protonation of CO<sub>3</sub><sup>2-</sup> to HCO<sub>3</sub><sup>-</sup>. An autotitrator METROHM (785 DMP titrino) was used.

## Results

- 30 Table S1 show the dependence of the results on the length of the pipes protruding for a TB reactor. These are the original data for the Figure 3. apart from the effects described in the paper, we can see the presence of small amount of intermediates for configurations different than TB-3. Also, a big error is associated to those values.

**Table S1** Results obtained using the TB-type reactors.

| entry            | Reactor | Yield, mol %    |          | Selectivity |            |       |           |          |            |
|------------------|---------|-----------------|----------|-------------|------------|-------|-----------|----------|------------|
|                  |         | CO <sub>2</sub> | TA       | TA          | PTA        | 4-CBA | HMBA      | pTOL     | BA         |
| 1 <sup>i</sup>   | pmTB    | 17.6 (0.4)      | 20 (2)   | 41 (1.7)    | 29.5 (0.4) | 9(4)  | 2.4 (0.4) | 12 (0.9) | 7.1 (0.3)  |
| 2 <sup>ii</sup>  | TB-1    | 29 (1)          | 35 (9)   | 69 (12)     | 14(9)      | 3(3)  | 0         | 0        | 14 (1.8)   |
| 3 <sup>iii</sup> | TB-2    | 26 (0.8)        | 38 (1.4) | 73 (6)      | 12(5)      | 3(2)  | 0         | 0        | 13.1 (0.5) |
| 4 <sup>iv</sup>  | TB-3    | 24.1 (0.4)      | 55 (0.6) | 89 (1.8)    | 1.8 (1.2)  | 0     | 0         | 0        | 9.5 (0.6)  |
| 5 <sup>v</sup>   | TB-3    | 22 (3)          | 57 (1.5) | 91 (0.9)    | 0.2 (0.3)  | 0     | 0         | 0        | 8 (0.6)    |

- 35 The catalyst is Cu/NH<sub>4</sub>/Br = 0.15/1.7/2.0; T=380 °C. Residence time is 5.8 s. <sup>i</sup>Average of two duplicated experiments done within few days and by different operators. <sup>ii</sup>Average of five duplicated experiments each after a manipulation of the reactor. <sup>iii</sup>Average of two duplicated experiments each after a manipulation of the reactor. <sup>iv</sup>Average of three duplicated experiments each after a manipulation of the reactor. <sup>v</sup>Average of two duplicated experiments separated by 3 years and carried out by different operators. Values between brackets are standard deviations.

In order to lower the CO<sub>2</sub> yield by improving the oxygen distribution along the reactor, two small holes were drilled at 2.5 cm from the end of the water/oxidant pipe. The concentration of oxygen and the flowrate are modified. Results are gathered in table S2.

- 40 **Table S2** Results obtained using the drilled Opposed Flow reactor (dOF).

| entry | [O <sub>2</sub> ] <sup>a</sup> | Residence time / s | Yield, mol %    |      | Selectivity |     |       |      |      |      |
|-------|--------------------------------|--------------------|-----------------|------|-------------|-----|-------|------|------|------|
|       |                                |                    | CO <sub>2</sub> | TA   | TA          | PTA | 4-CBA | HMBA | pTOL | BA   |
| 1     | 1.5                            | 2.8                | 29.0            | 53.1 | 76.7        | 8.5 | 3.7   | 0.0  | 0.0  | 11.1 |
| 2     | 1.5                            | 4.1                | 27.7            | 56.3 | 82.1        | 3.7 | 2.6   | 0.0  | 0.0  | 11.6 |

|   |     |     |      |      |      |      |     |     |     |      |
|---|-----|-----|------|------|------|------|-----|-----|-----|------|
| 3 | 3.0 | 1.7 | 28.3 | 41.6 | 61.9 | 19.4 | 6.6 | 3.3 | 0.0 | 9.9  |
| 4 | 3.0 | 2.8 | 35.1 | 48.6 | 81.6 | 4.5  | 1.4 | 0.0 | 0.0 | 12.5 |

Temperature is 380 °C. Feed is the same than for previous experiments except the water/oxidant one where O<sub>2</sub> concentration and flowrates are varied.  
<sup>a</sup>Concentration relative to the stoichiometric amount to oxidize all the pX.

As shown in entry 1, and comparing it to entry 3 in table S3, dOF gives slightly better results than OF in terms of TA and CO<sub>2</sub> yield but TA selectivity is slightly lower. Increasing residence time (entry 2) leads to better TA yield and selectivity as well as 5 fewer amounts of intermediates and CO<sub>2</sub>. dOF may suppose an improvement to OF but O<sub>2</sub> concentration and water flowrate must be chosen carefully. A double oxygen concentration decreases TA yield and gives much higher burn.

Table S3 shows a comparison of the performance of some of the reactors used. Those data are the table 2 expanded. Notice that selectivity for intermediates is higher for OF reactors than for TB reactors. Amount of 4-CBA is relatively high at 330 °C.

10 **Table S3** Comparison of the performance of the reactors used.

| entry | Reactor | T / °C | RT <sup>a</sup> / s | Yield, mol %    |      | Selectivity |      |       |      |      | CB <sup>b</sup> |       |
|-------|---------|--------|---------------------|-----------------|------|-------------|------|-------|------|------|-----------------|-------|
|       |         |        |                     | CO <sub>2</sub> | TA   | TA          | PTA  | 4-CBA | HMBA | pTOL |                 | BA    |
| 1     | TB-3    | 380    | 5.8                 | 22              | 57   | 91          | 0.2  | 0     | 0    | 0    | 8               | 84    |
| 2     | OF      | 380    | 5.6                 | 25-31           | 52   | 81-84       | 3    | 1-3   | 0    | 0    | 13              | 88-94 |
| 3     | OF      | 380    | 2.8                 | 30              | 51.8 | 80.1        | 5.6  | 2.5   | 0.0  | 0.0  | 11.8            | 95    |
| 4     | dOF     | 380    | 2.8                 | 29              | 53.1 | 76.7        | 8.5  | 3.7   | 0.0  | 0.0  | 11.1            | 98    |
| 5     | TB-1    | 330    | 18.9                | 21              | 42   | 57.4        | 18.5 | 19.7  | 0.0  | 0.0  | 4.3             | 94    |
| 6     | TB-3    | 330    | 18.9                | 21              | 41.8 | 60.8        | 21.4 | 14.0  | 0.0  | 0.0  | 3.7             | 89.9  |
| 7     | pmTB    | 330    | 18.9                | 18              | 29   | 57.4        | 16.8 | 19.7  | 0.0  | 1.5  | 4.3             | 69    |
| 8     | OF      | 330    | 8.9                 | 14.5            | 11.5 | 14.9        | 45.9 | 21.3  | 1.5  | 14.5 | 1.9             | 91    |

<sup>a</sup>Estimated residence time; <sup>b</sup>Carbon balance closure.

Finally, Table S4 gives the expanded data for Table 3. At high concentrations of reactants, High TA yield and selectivity are obtained with a relatively low amount of CO<sub>2</sub> and BA formed using TB and long enough residence time (see entry 3). Low 15 amounts of intermediates are also obtained.

**Table S4** Comparison between TB and OF using higher reactant concentrations and Cu/Co/H/Br catalyst. T = 330 °C.

| entry          | Reactor | RT <sup>c</sup> / s | Yield, mol %    |        | Selectivity |            |           |       |           | CB <sup>d</sup> |        |
|----------------|---------|---------------------|-----------------|--------|-------------|------------|-----------|-------|-----------|-----------------|--------|
|                |         |                     | CO <sub>2</sub> | TA     | TA          | PTA        | 4-CBA     | HMBA  | pTOL      |                 | BA     |
| 1 <sup>b</sup> | TB-1    | 19.1                | 8.5(1)          | 41 (2) | 56(4)       | 27 (0.3)   | 9.3 (1.3) | 2 (3) | 1.0 (1.3) | 4.1 (1.1)       | 87 (3) |
| 2 <sup>b</sup> | OF      | 8.3                 | 8               | 59 (2) | 74(2)       | 14.1 (0.4) | 6.3 (1.2) | 0     | 0.3 (0.4) | 6(2)            | 93 (5) |
| 3 <sup>a</sup> | OF      | 17.3                | 10              | 62.8   | 89.4        | 3.2        | 1.7       | 0     | 0.9       | 4.8             | 81     |

<sup>a</sup>Total flowrate was reduced to give higher residence time; <sup>b</sup> average of two duplicate experiments. Values between brackets are standard deviations;

<sup>c</sup>Estimated Residence time. <sup>d</sup>Carbon balance closure
